# Supplementary material
Source: HighWire-hosted journal article supplement (https://openres.ersjournals.com/content/9/2/00371-2022)
Supplement: inline-supplementary-material-2 [file inline-supplementary-material-2.pdf]

## SUPPLEMENTARY MATERIAL

### Normal values of respiratory oscillometry in South African children and adolescents

Shaakira Chaya <sup>1</sup>, Rae MacGinty <sup>1</sup>, Carvern Jacobs <sup>1</sup>, Leah Githinji <sup>1</sup>, Siphon Hlengwa <sup>1</sup>, Shannon J Simpson <sup>2,3</sup>, Heather J Zar <sup>1</sup>, Zoltan Hantos <sup>4\*</sup>, Diane M Gray <sup>1\*</sup>

<sup>1</sup>Department of Paediatrics and Child Health, Red Cross War Memorial Children's Hospital and SA-MRC Unit on Child and Adolescent Health, University of Cape Town, Cape Town, South Africa; <sup>2</sup>Wal-yan Respiratory Centre, Telethon Kids Institute, Perth, Australia; <sup>3</sup>School of Allied Health, Curtin University, Perth, Australia; <sup>4</sup>Department of Anaesthesiology and Intensive Therapy, Semmelweis University, Budapest, Hungary

\*Joint senior authors

### Table of content

| <u>Tables</u>                                                                                    | <u>Page</u> |
|--------------------------------------------------------------------------------------------------|-------------|
| Table S1: Demographic data stratified by age.....                                                | 1           |
| Table S2: Summary of respiratory impedance variables stratified by age.....                      | 2           |
| Table S3 : Comparison between models adjusted for height only and height, sex and ethnicity..... | 4           |
| Table S4: Reference equations for children 3 to 7 years of age from the DCHS cohort.....         | 5           |
| Table S5 : Summary of reference studies on resistance (R) vs height (Ht) relationships.....      | 13          |

  

| <u>Figures</u>                                                                                                                                           |    |
|----------------------------------------------------------------------------------------------------------------------------------------------------------|----|
| Figure S1: Illustration of the resistance (R) - inertance (I) – compliance (C) model fitting to measured.....                                            | 6  |
| Figure S2: Conventional oscillometry measures vs height.....                                                                                             | 7  |
| Figure S3: Intra-breath oscillometry measures vs height.....                                                                                             | 8  |
| Figure S4: Comparison of respiratory resistance (R <sub>rs</sub> ) vs height (Ht) relationships with previous studies.....                               | 9  |
| Figure S5: Comparison of at 10-Hz resistance (R <sub>10</sub> ) and reactance (X <sub>10</sub> ) vs height (Ht) relationships with previous studies...11 |    |
| Figure S6: Comparison of resonance frequency (F <sub>res</sub> ) vs height (Ht) relationships with previous studies .....                                | 12 |

**Table S1: Demographic data stratified by age**

| Years                              | 3<br>(n=104)                | 4<br>(n=131)              | 5<br>(n=114)               | 6<br>(n=128)               | 7<br>(n=103)               | 8<br>(n=9)                 | 9<br>(n=7)                 | 10<br>(n=12)               | 11<br>(n=23)               | 12<br>(n=11)               | 13<br>(n=11)               | 14<br>(n=10)                | 15<br>(n=9)                 | 16<br>(n=9)                 | 17<br>(n=11)               | Total<br>(n=692)           |
|------------------------------------|-----------------------------|---------------------------|----------------------------|----------------------------|----------------------------|----------------------------|----------------------------|----------------------------|----------------------------|----------------------------|----------------------------|-----------------------------|-----------------------------|-----------------------------|----------------------------|----------------------------|
| <b>Site</b>                        |                             |                           |                            |                            |                            |                            |                            |                            |                            |                            |                            |                             |                             |                             |                            |                            |
| CTAAC                              | 0<br>(0.0%)                 | 0<br>(0.0%)               | 0<br>(0.0%)                | 0<br>(0.0%)                | 0<br>(0.0%)                | 0<br>(0.0%)                | 0<br>(0.0%)                | 0<br>(0.0%)                | 0<br>(0.0%)                | 0<br>(0.0%)                | 0<br>(0.0%)                | 9<br>(90.0%)                | 9<br>(100%)                 | 9<br>(100%)                 | 11<br>(100%)               | 38<br>(5.5%)               |
| HCSOC                              | 0<br>(0.0%)                 | 0<br>(0.0%)               | 1<br>(0.9%)                | 0<br>(0.0%)                | 6<br>(5.8%)                | 9<br>(100%)                | 7<br>(100%)                | 12<br>(100%)               | 23<br>(100%)               | 11<br>(100%)               | 11<br>(100%)               | 1<br>(10.0%)                | 0<br>(0.0%)                 | 0<br>(0.0%)                 | 0<br>(0.0%)                | 81<br>(11.7%)              |
| DCHS                               | 104<br>(100%)               | 131<br>(100%)             | 113<br>(99.1%)             | 128<br>(100%)              | 97<br>(94.2%)              | 0<br>(0%)                   | 0<br>(0%)                   | 0<br>(0%)                   | 0<br>(0%)                  | 573<br>(82.8%)             |
| <b>Sex</b>                         |                             |                           |                            |                            |                            |                            |                            |                            |                            |                            |                            |                             |                             |                             |                            |                            |
| Female                             | 52<br>(50.0%)               | 69<br>(52.7%)             | 53<br>(46.5%)              | 63<br>(49.2%)              | 48<br>(46.6%)              | 6<br>(66.7%)               | 3<br>(42.9%)               | 4<br>(33.3%)               | 9<br>(39.1%)               | 3<br>(27.3%)               | 5<br>(45.4%)               | 3<br>(30.0%)                | 5<br>(55.6%)                | 5<br>(55.6%)                | 47<br>(63.6%)              | 335<br>(48.4%)             |
| Male                               | 52<br>(50%)                 | 62<br>(47.33%)            | 61<br>(53.51%)             | 65<br>(50.78%)             | 55<br>(53.40%)             | 3<br>(33.33%)              | 4<br>(57.14%)              | 8<br>(66.67%)              | 14<br>(60.87%)             | 8<br>(72.73%)              | 6<br>(54.55%)              | 7<br>(70%)                  | 4<br>(44.44%)               | 4<br>(44.44%)               | 4<br>(36.36%)              | 357<br>(51.59%)            |
| <b>Weight (kg)*</b>                | 13.50<br>(12.6;<br>14.3)    | 15.3<br>(14.4;<br>17.1)   | 17.8<br>(16.1;<br>19.5)    | 19.5<br>(17.4;<br>21.9)    | 21.1<br>(19.2;<br>23.9)    | 29.5<br>(25.5;<br>30.0)    | 28.5<br>(26.4;<br>37.0)    | 36.2<br>(31.0;<br>40.8)    | 35.7<br>(30.7;<br>42.9)    | 41.0<br>(31.1;<br>49.8)    | 45.2<br>(34.2;<br>49.8)    | 49.0<br>(44.0;<br>62.0)     | 52.0<br>(41.0;<br>69.0)     | 55.0<br>(49.0;<br>61.0)     | 55.0<br>(49.0;<br>61.0)    | 18.2<br>(15.3;<br>23.1)    |
| <b>WAZ*</b>                        | -0.54<br>(-1.11; -<br>0.02) | -0.58<br>(-1.05;<br>0.25) | -0.37<br>(-1.09;<br>0.31)  | -0.50<br>(-1.38;<br>0.34)  | -0.63<br>(-1.37;<br>0.34)  | 0.66<br>(-0.07;<br>1.33)   | -0.17<br>(-0.61;<br>1.33)  | 0.88<br>(-0.10;<br>1.56)   | 0.28<br>(-0.74;<br>0.80)   | 0.21<br>(-1.34;<br>1.10)   | 0.31<br>(-1.40;<br>0.63)   | -0.11<br>(-0.51;<br>0.91)   | -0.77<br>(-1.58;<br>1.42)   | 0.08<br>(-1.28;<br>0.62)    | -0.04<br>(-1.42;<br>0.95)  | -0.42<br>(-1.11;<br>0.35)  |
| <b>Height (cm)*</b>                | 92.3<br>(89.0;<br>95.0)     | 101.0<br>(97.0;<br>104.5) | 107.0<br>(104.0;<br>111.4) | 114.0<br>(110.0;<br>117.5) | 120.0<br>(115.5;<br>124.0) | 127.0<br>(126.0;<br>131.0) | 132.0<br>(120.0;<br>145.0) | 140.3<br>(138.3;<br>145.0) | 141.0<br>(136.7;<br>146.0) | 151.0<br>(143.0;<br>152.0) | 144.0<br>(142.0;<br>158.5) | 156.8<br>(153.0;<br>161.0)  | 158.0<br>(151.0;<br>159.0)  | 160.5<br>(156.6;<br>163.0)  | 161.0<br>(157.5;<br>167.0) | 110.0<br>(101.0;<br>120.0) |
| <b>HAZ*</b>                        | -1.18<br>(-2.00; -<br>0.49) | -0.69<br>(-1.51;<br>0.04) | -0.69<br>(-1.40;<br>0.16)  | -0.64<br>(-1.26;<br>0.13)  | -0.41<br>(-1.25;<br>0.29)  | 0.01<br>(-0.38;<br>0.47)   | -0.42<br>(-1.79;<br>1.62)  | 0.27<br>(-0.22;<br>0.82)   | -0.46<br>(-1.29;<br>0.09)  | 0.03<br>(-1.13;<br>0.53)   | -1.33<br>(-1.99;<br>0.58)  | -0.79<br>(-1.37; -<br>0.20) | -1.46<br>(-1.49; -<br>0.49) | -0.82<br>(-1.82; -<br>0.22) | -0.31<br>(-1.61;<br>-0.14) | -0.65<br>(-1.43;<br>0.05)  |
| <b>BMI<br/>(kg/m<sup>2</sup>)*</b> | 15.7<br>(15.0;<br>16.9)     | 15.3<br>(14.5;<br>16.3)   | 15.2<br>(14.4;<br>16.0)    | 15.0<br>(13.9;<br>16.2)    | 14.7<br>(14.1;<br>15.8)    | 16.9<br>(15.6;<br>18.5)    | 16.4<br>(15.4;<br>19.4)    | 17.9<br>(16.6;<br>20.3)    | 18.9<br>(15.6;<br>20.1)    | 19.4<br>(15.9;<br>21.8)    | 18.7<br>(17.0;<br>24.0)    | 19.4<br>(18.0;<br>24.7)     | 19.6<br>(18.4;<br>27.8)     | 21.8<br>(17.9;<br>23.7)     | 21.8<br>(17.9;<br>23.7)    | 15.5<br>(14.5;<br>17.0)    |
| <b>BMI-Z*</b>                      | 0.22 (-<br>0.38;<br>1.09)   | 0.00<br>(-0.62;<br>0.73)  | -0.04 (-<br>0.61;<br>0.56) | -0.27<br>(-1.01;<br>0.53)  | -0.45<br>(-1.15;<br>0.19)  | 0.55<br>(-0.14;<br>1.21)   | 0.10<br>(-0.44;<br>1.33)   | 0.71<br>(0.10;<br>1.47)    | 0.82<br>(-0.88;<br>1.27)   | 0.39<br>(-0.85;<br>1.59)   | 0.15<br>(-0.87;<br>1.58)   | 0.23<br>(-0.62;<br>1.67)    | -0.09<br>(-0.63;<br>1.88)   | 0.37<br>(-1.15;<br>0.86)    | 0.47<br>(-0.46;<br>1.10)   | -0.04<br>(-0.70;<br>0.76)  |

CTAAC: Cape Town Adolescent Antiretroviral Cohort; HCSOC: Healthy children at surgical outpatient clinics; DCHS: Drakenstein Child Health Study; BMI: Body mass index; WAZ: weight for age z-score; HAZ: height for age z-score;

BMI-Z: Body mass index z-score.

\*Median (interquartile range)

**Table S2: Summary of respiratory impedance variables stratified by age**

| years     | Standard                   |                            |                            |                            |                            |                            |                                 |                            |                            |                            |                          | Intrabreath                |                           |                           |                           |                          |                           |
|-----------|----------------------------|----------------------------|----------------------------|----------------------------|----------------------------|----------------------------|---------------------------------|----------------------------|----------------------------|----------------------------|--------------------------|----------------------------|---------------------------|---------------------------|---------------------------|--------------------------|---------------------------|
|           | R <sub>6</sub>             | R <sub>8</sub>             | R <sub>10</sub>            | X <sub>6</sub>             | X <sub>8</sub>             | X <sub>10</sub>            | R <sub>6</sub> -R <sub>20</sub> | F <sub>res</sub>           | Ax                         | R                          | C                        | R <sub>eE</sub>            | R <sub>eI</sub>           | X <sub>eE</sub>           | X <sub>eI</sub>           | ΔR                       | ΔX                        |
| <b>3</b>  | <b>n=104</b>                    | <b>n=51</b>                | <b>n=104</b>               | <b>n=104</b>               | <b>n=104</b>             | <b>n=104</b>               | <b>n=104</b>              | <b>n=104</b>              | <b>n=104</b>              | <b>n=104</b>             | <b>n=104</b>              |
|           | 13.23<br>(11.81;<br>15.35) | 12.50<br>(11.31;<br>14.29) | 12.05<br>(10.83;<br>13.65) | -4.56<br>(-5.63;<br>-3.57) | -3.79<br>(-4.69;<br>3.08)  | -3.07<br>(-3.76;<br>-2.41) | 2.76<br>(1.95;<br>3.63)         | 25.21<br>(22.71;<br>27.84) | 45.22<br>(34.66;<br>61.22) | 11.39<br>(10.09;<br>12.95) | 5.05<br>(4.21;<br>5.78)  | 11.69<br>(10.47;<br>13.63) | 10.29<br>(9.26;<br>12.43) | -2.30<br>(-3.13;<br>1.48) | -3.10<br>(-3.75;<br>2.35) | 1.22<br>(0.66;<br>2.43)  | 0.80<br>(-0.01;<br>1.37)  |
| <b>4</b>  | <b>n=131</b>                    | <b>n=89</b>                | <b>n=131</b>               | <b>n=131</b>               | <b>n=131</b>             | <b>n=131</b>               | <b>n=131</b>              | <b>n=131</b>              | <b>n=131</b>              | <b>n=131</b>             | <b>n=131</b>              |
|           | 11.71<br>(9.96;<br>13.23)  | 10.72<br>(9.48;<br>12.34)  | 10.27<br>(9.16;<br>12.00)  | -3.45<br>(-4.67;<br>2.67)  | -2.91<br>(-3.88;<br>-2.02) | -2.28<br>(-3.29;<br>-1.60) | 2.47<br>(1.57;<br>3.48)         | 22.01<br>(18.25;<br>24.69) | 28.90<br>(19.64;<br>48.27) | 9.70<br>(8.73;<br>10.93)   | 6.03<br>(4.66;<br>7.61)  | 10.02<br>(8.77;<br>11.73)  | 9.23<br>(8.11;<br>10.62)  | -1.51<br>(-2.57;<br>0.78) | -2.33<br>(-3.12;<br>1.68) | 0.76<br>(-0.18;<br>1.62) | 0.69<br>(0.01;<br>1.41)   |
| <b>5</b>  | <b>n=114</b>                    | <b>n=83</b>                | <b>n=114</b>               | <b>n=114</b>               | <b>n=114</b>             | <b>n=114</b>               | <b>n=114</b>              | <b>n=114</b>              | <b>n=114</b>              | <b>n=114</b>             | <b>n=114</b>              |
|           | 10.14<br>(8.60;<br>12.20)  | 9.58<br>(8.26;<br>10.98)   | 9.20<br>(7.93;<br>10.63)   | -2.91<br>(-3.76;<br>2.38)  | -2.48<br>(-3.37;<br>1.95)  | -2.04<br>(-2.73;<br>-1.44) | 2.17<br>(1.51;<br>3.11)         | 21.02<br>(18.15;<br>25.08) | 28.26<br>(16.37;<br>40.02) | 8.40<br>(7.36;<br>9.85)    | 6.79<br>(5.67;<br>8.39)  | 8.66<br>(7.37;<br>10.26)   | 7.94<br>(6.86;<br>9.62)   | -1.28<br>(-2.32;<br>0.73) | -1.95<br>(-2.60;<br>1.45) | 0.42<br>(-0.22;<br>1.20) | 0.52<br>(0.07;<br>0.97)   |
| <b>6</b>  | <b>n=128</b>                    | <b>n=109</b>               | <b>n=128</b>               | <b>n=128</b>               | <b>n=128</b>             | <b>n=128</b>               | <b>n=128</b>              | <b>n=128</b>              | <b>n=128</b>              | <b>n=128</b>             | <b>n=128</b>              |
|           | 9.05<br>(8.13;<br>10.47)   | 8.58<br>(7.57;<br>9.94)    | 8.30<br>(7.31;<br>9.59)    | -2.74<br>(-3.52;<br>-2.15) | -2.18<br>(-2.74;<br>1.50)  | -1.68<br>(-2.16;<br>-1.17) | 1.86<br>(1.27;<br>2.72)         | 20.71<br>(17.93;<br>23.73) | 20.08<br>(14.48;<br>29.75) | 7.68<br>(6.76;<br>8.80)    | 7.44<br>(6.38;<br>9.34)  | 7.71<br>(6.69;<br>9.08)    | 7.54<br>(6.35;<br>8.90)   | -1.17<br>(-1.60;<br>0.56) | -1.70<br>(-2.18;<br>1.15) | 0.41<br>(-0.34;<br>1.03) | 0.57<br>(0.10;<br>0.87)   |
| <b>7</b>  | <b>n=103</b>                    | <b>n=88</b>                | <b>n=103</b>               | <b>n=103</b>               | <b>n=103</b>             | <b>n=103</b>               | <b>n=103</b>              | <b>n=103</b>              | <b>n=103</b>              | <b>n=103</b>             | <b>n=103</b>              |
|           | 7.62<br>(6.52;<br>9.38)    | 7.33<br>(6.15;<br>8.56)    | 6.90<br>(6.14;<br>8.47)    | -2.03<br>(-2.98;<br>-1.69) | -1.61<br>(-2.31;<br>1.31)  | -1.39<br>(-1.92;<br>-0.90) | 1.71<br>(1.10;<br>2.46)         | 19.28<br>(16.29;<br>22.93) | 16.48<br>(9.94;<br>27.34)  | 6.43<br>(5.63;<br>7.67)    | 9.66<br>(7.60;<br>11.16) | 6.57<br>(5.57;<br>7.97)    | 6.30<br>(5.44;<br>7.38)   | -0.80<br>(-1.78;<br>0.36) | -1.39<br>(-1.91;<br>0.96) | 0.29<br>(-0.19;<br>0.63) | 0.54<br>(0.07;<br>0.89)   |
| <b>8</b>  | <b>n=9</b>                      | <b>n=4</b>                 | <b>n=9</b>                 | <b>n=9</b>                 | <b>n=9</b>               | <b>n=9</b>                 | <b>n=9</b>                | <b>n=9</b>                | <b>n=9</b>                | <b>n=9</b>               | <b>n=9</b>                |
|           | 7.14<br>(6.46;<br>9.05)    | 6.30<br>(5.93;<br>8.56)    | 5.78<br>(5.65;<br>7.60)    | -2.02<br>(-3.32;<br>1.95)  | -2.44<br>(-3.50;<br>2.00)  | -2.34<br>(-3.42;<br>-1.60) | 2.29<br>(1.01;<br>4.00)         | 21.07<br>(17.74;<br>25.69) | 35.40<br>(17.57;<br>60.76) | 5.76<br>(5.36;<br>6.18)    | 7.41<br>(5.53;<br>10.94) | 6.10<br>(5.27;<br>7.22)    | 6.44<br>(4.43;<br>6.73)   | -2.17<br>(-3.23;<br>1.20) | -1.57<br>(-2.51;<br>1.20) | 0.55<br>(0.06;<br>1.67)  | 0.004<br>(-0.66;<br>0.45) |
| <b>9</b>  | <b>n=7</b>                      | <b>n=5</b>                 | <b>n=7</b>                 | <b>n=7</b>                 | <b>n=7</b>               | <b>n=7</b>                 | <b>n=7</b>                | <b>n=7</b>                | <b>n=7</b>                | <b>n=7</b>               | <b>n=7</b>                |
|           | 7.02<br>(5.48;<br>10.79)   | 6.46<br>(4.87;<br>9.72)    | 5.89<br>(4.43;<br>9.21)    | -2.36<br>(-4.19;<br>1.36)  | -2.54<br>(-2.96;<br>1.44)  | -1.93<br>(-3.42;<br>-0.72) | 2.40<br>(1.13;<br>3.34)         | 20.17<br>(17.48;<br>25.79) | 32.12<br>(8.70;<br>54.33)  | 5.04<br>(3.98;<br>8.38)    | 6.99<br>(5.29;<br>13.70) | 6.11<br>(3.89;<br>8.07)    | 5.12<br>(4.12;<br>8.14)   | -1.35<br>(-2.64;<br>0.50) | -1.71<br>(-2.91;<br>0.42) | 0.22<br>(-0.07;<br>1.00) | -0.08<br>(-0.28;<br>0.27) |
| <b>10</b> | <b>n=12</b>                     | <b>n=8</b>                 | <b>n=12</b>                | <b>n=12</b>                | <b>n=12</b>              | <b>n=12</b>                | <b>n=12</b>               | <b>n=12</b>               | <b>n=12</b>               | <b>n=12</b>              | <b>n=12</b>               |
|           | 5.86<br>(4.67;<br>6.63)    | 5.74<br>(4.36;<br>6.58)    | 5.56<br>(4.51;<br>6.16)    | -2.32<br>(-3.26;<br>1.32)  | -1.55<br>(-2.59;<br>1.18)  | -1.23<br>(-2.24;<br>-0.85) | 1.04<br>(0.65;<br>2.21)         | 19.97<br>(18.11;<br>23.99) | 20.41<br>(10.63;<br>39.11) | 5.31<br>(3.84;<br>5.80)    | 9.51<br>(7.14;<br>14.92) | 5.12<br>(3.99;<br>6.90)    | 4.67<br>(3.72;<br>5.33)   | -1.16<br>(-2.31;<br>0.35) | -1.17<br>(1.84;<br>0.76)  | 0.75<br>(0.06;<br>1.38)  | -0.13<br>(-0.37;<br>0.26) |
| <b>11</b> | <b>n=23</b>                     | <b>n=21</b>                | <b>n=23</b>                | <b>n=23</b>                | <b>n=23</b>              | <b>n=23</b>                | <b>n=23</b>               | <b>n=23</b>               | <b>n=23</b>               | <b>n=23</b>              | <b>n=23</b>               |
|           | 5.15<br>(4.34;<br>5.85)    | 4.62<br>(3.83;<br>5.64)    | 4.42<br>(3.79;<br>5.22)    | -1.92<br>(-2.43;<br>-1.46) | -1.61<br>(-2.04;<br>1.19)  | -1.29<br>(-1.89;<br>-0.87) | 1.64<br>(0.88;<br>2.43)         | 18.57<br>(16.46;<br>20.98) | 15.77<br>(10.44;<br>24.20) | 3.89<br>(3.41;<br>4.51)    | 9.84<br>(7.22;<br>13.01) | 3.98<br>(3.72;<br>4.58)    | 3.55<br>(3.16;<br>4.18)   | -0.93<br>(-1.41;<br>0.51) | -0.89<br>(-1.58;<br>0.52) | 0.40<br>(0.20;<br>0.77)  | -0.09<br>(-0.34;<br>0.10) |
| <b>12</b> | <b>n=11</b>                     | <b>n=10</b>                | <b>n=11</b>                | <b>n=11</b>                | <b>n=11</b>              | <b>n=11</b>                | <b>n=11</b>               | <b>n=11</b>               | <b>n=11</b>               | <b>n=11</b>              | <b>n=11</b>               |

|              |                          |                          |                          |                            |                           |                            |                          |                            |                            |                          |                            |                          |                         |                           |                           |                          |                           |
|--------------|--------------------------|--------------------------|--------------------------|----------------------------|---------------------------|----------------------------|--------------------------|----------------------------|----------------------------|--------------------------|----------------------------|--------------------------|-------------------------|---------------------------|---------------------------|--------------------------|---------------------------|
|              | 4.50<br>(3.73;<br>6.61)  | 4.35<br>(3.75;<br>6.70)  | 4.18<br>(3.33;<br>5.66)  | -1.96<br>(-2.16;<br>-1.05) | -1.15<br>(-2.12;<br>0.81) | -0.91<br>(-1.70;<br>-0.17) | 1.09<br>(0.36;<br>2.30)  | 19.71<br>(16.04;<br>24.87) | 18.22<br>(6.17;<br>19.35)  | 4.16<br>(2.44;<br>5.42)  | 13.42<br>(8.91;<br>17.85)  | 4.24<br>(3.14;<br>5.22)  | 3.42<br>(2.51;<br>3.83) | -0.55<br>(-0.91;<br>0.40) | -0.48<br>(-1.29;<br>0.36) | 0.54<br>(0.36;<br>1.79)  | -0.10<br>(-0.20;<br>0.02) |
| <b>13</b>    | <b>n=11</b>              | <b>n=11</b>              | <b>n=11</b>              | <b>n=11</b>                | <b>n=11</b>               | <b>n=11</b>                | <b>n=11</b>              | <b>n=9</b>                 | <b>n=11</b>                | <b>n=11</b>              | <b>n=11</b>                | <b>n=11</b>              | <b>n=11</b>             | <b>n=11</b>               | <b>n=11</b>               | <b>n=11</b>              | <b>n=11</b>               |
|              | 4.19<br>(3.51;<br>5.57)  | 3.91<br>(3.25;<br>4.53)  | 3.99<br>(3.24;<br>4.20)  | -1.56<br>(-1.89;<br>1.32)  | -1.22<br>(-1.95;<br>0.97) | -0.86<br>(-1.40;<br>-0.60) | 0.86<br>(0.38;<br>1.61)  | 17.59<br>(14.45;<br>19.18) | 11.80<br>(5.98;<br>20.48)  | 3.33<br>(3.11;<br>3.85)  | 12.52<br>(10.51;<br>15.45) | 3.58<br>(2.89;<br>3.96)  | 2.56<br>(2.33;<br>3.79) | -0.69<br>(-1.05;<br>0.03) | -0.74<br>(-1.29;<br>0.36) | 0.58<br>(0.34;<br>1.08)  | 0.07<br>(-0.31;<br>0.43)  |
| <b>14</b>    | <b>n=10</b>              | <b>n=10</b>              | <b>n=10</b>              | <b>n=10</b>                | <b>n=10</b>               | <b>n=10</b>                | <b>n=10</b>              | <b>n=10</b>                | <b>n=10</b>                | <b>n=10</b>              | <b>n=10</b>                | <b>n=10</b>              | <b>n=10</b>             | <b>n=10</b>               | <b>n=10</b>               | <b>n=10</b>              | <b>n=10</b>               |
|              | 4.50<br>(3.51;<br>5.30)  | 4.30<br>(3.23;<br>5.04)  | 4.29<br>(3.30;<br>4.84)  | -1.22<br>(-1.62;<br>-0.90) | -0.94<br>(-1.01;<br>0.35) | -0.63<br>(-0.83;<br>-0.56) | 0.41<br>(0.01;<br>0.77)  | 15.74<br>(13.00;<br>20.58) | 6.11<br>(1.40;<br>9.42)    | 4.08<br>(3.42;<br>4.82)  | 16.98<br>(15.29;<br>18.07) | 3.43<br>(2.98;<br>4.00)  | 3.27<br>(2.49;<br>3.66) | -0.28<br>(-0.73;<br>0.31) | -0.50<br>(-0.67;<br>0.20) | 0.27<br>(0.11;<br>0.57)  | 0.23<br>(0.15;<br>0.43)   |
| <b>15</b>    | <b>n=9</b>               | <b>n=9</b>               | <b>n=9</b>               | <b>n=9</b>                 | <b>n=9</b>                | <b>n=9</b>                 | <b>n=9</b>               | <b>n=8</b>                 | <b>n=9</b>                 | <b>n=9</b>               | <b>n=9</b>                 | <b>n=9</b>               | <b>n=9</b>              | <b>n=9</b>                | <b>n=9</b>                | <b>n=9</b>               | <b>n=9</b>                |
|              | 3.77<br>(3.16;<br>4.74)  | 4.00<br>(3.31;<br>4.66)  | 3.86<br>(3.35;<br>4.54)  | -1.19<br>(-1.47;<br>0.92)  | -0.94<br>(-1.13;<br>0.50) | -0.67<br>(-0.81;<br>-0.43) | 0.05<br>(-0.04;<br>0.53) | 14.00<br>(11.95;<br>15.27) | 4.77<br>(3.07;<br>6.80)    | 3.82<br>(3.43;<br>4.55)  | 17.27<br>(14.48;<br>18.07) | 3.63<br>(3.06;<br>4.19)  | 2.78<br>(2.55;<br>3.53) | -0.17<br>(-0.46;<br>0.16) | -0.45<br>(-0.54;<br>0.14) | 0.57<br>(0.34;<br>0.76)  | 0.08<br>(-0.001;<br>0.27) |
| <b>16</b>    | <b>n=9</b>               | <b>n=9</b>               | <b>n=9</b>               | <b>n=9</b>                 | <b>n=9</b>                | <b>n=9</b>                 | <b>n=9</b>               | <b>n=8</b>                 | <b>n=9</b>                 | <b>n=9</b>               | <b>n=9</b>                 | <b>n=9</b>               | <b>n=9</b>              | <b>n=9</b>                | <b>n=9</b>                | <b>n=9</b>               | <b>n=9</b>                |
|              | 3.39<br>(3.01;<br>4.11)  | 3.02<br>(2.93;<br>3.78)  | 3.18<br>(2.74;<br>3.79)  | -1.23<br>(-1.40;<br>-1.19) | -0.66<br>(-0.70;<br>0.59) | -0.37<br>(-0.66;<br>-0.28) | 0.23<br>(0.01;<br>0.58)  | 14.83<br>(13.26;<br>15.94) | 4.18<br>(4.36;<br>4.33)    | 3.19<br>(2.67;<br>3.83)  | 19.24<br>(17.78;<br>19.75) | 2.97<br>(2.46;<br>3.84)  | 2.50<br>(2.20;<br>3.32) | -0.02<br>(-0.25;<br>0.02) | -0.42<br>(-0.75;<br>0.13) | 0.29<br>(0.15;<br>0.67)  | 0.30<br>(0.03;<br>0.46)   |
| <b>17</b>    | <b>n=11</b>              | <b>n=11</b>              | <b>n=11</b>              | <b>n=11</b>                | <b>n=11</b>               | <b>n=11</b>                | <b>n=11</b>              | <b>n=11</b>                | <b>n=11</b>                | <b>n=11</b>              | <b>n=11</b>                | <b>n=11</b>              | <b>n=11</b>             | <b>n=11</b>               | <b>n=11</b>               | <b>n=11</b>              | <b>n=11</b>               |
|              | 3.41<br>(2.88;<br>4.59)  | 3.29<br>(2.32;<br>4.34)  | 3.13<br>(2.39;<br>4.08)  | -1.23<br>(-1.50;<br>1.11)  | -0.79<br>(-1.07;<br>0.38) | -0.39<br>(-0.77;<br>-0.15) | 0.47<br>(0.06;<br>0.58)  | 14.56<br>(12.23;<br>16.45) | 4.16<br>(2.23;<br>7.62)    | 3.31<br>(2.37;<br>4.18)  | 15.89<br>(13.85;<br>17.98) | 2.70<br>(2.00;<br>3.33)  | 2.22<br>(2.01;<br>2.93) | -0.28<br>(-0.39;<br>0.12) | -0.44<br>(-0.64;<br>0.07) | 0.23<br>(-0.04;<br>0.42) | 0.17<br>(0.05;<br>0.32)   |
| <b>Total</b> | <b>n=692</b>             | <b>n=692</b>             | <b>n=692</b>             | <b>n=692</b>               | <b>n=692</b>              | <b>n=692</b>               | <b>n=692</b>             | <b>n=514</b>               | <b>n=692</b>               | <b>n=692</b>             | <b>n=692</b>               | <b>n=692</b>             | <b>n=692</b>            | <b>n=692</b>              | <b>n=692</b>              | <b>n=692</b>             | <b>n=692</b>              |
|              | 9.62<br>(7.19;<br>12.26) | 9.15<br>(6.90;<br>11.33) | 8.88<br>(6.65;<br>10.79) | -2.83<br>(-3.95;<br>1.97)  | -2.34<br>(-3.31;<br>1.51) | -1.84<br>(-2.77;<br>-1.18) | 2.01<br>(1.15;<br>2.99)  | 20.67<br>(17.16;<br>24.57) | 24.30<br>(14.26;<br>39.53) | 8.11<br>(6.08;<br>10.11) | 7.20<br>(5.48;<br>9.85)    | 8.22<br>(6.22;<br>10.60) | 7.85<br>(5.97;<br>9.62) | -1.23<br>(-2.23;<br>0.55) | -1.87<br>(-2.68;<br>1.13) | 0.53<br>(-0.04;<br>1.22) | 0.50<br>(-0.05;<br>0.97)  |

R<sub>6</sub>, R<sub>8</sub> and R<sub>10</sub>: resistance at 6, 8 and 10 Hz; X<sub>6</sub>, X<sub>8</sub> and X<sub>10</sub>: reactance at 6, 8 and 10 Hz; F<sub>res</sub>: resonance frequency; R<sub>6</sub>-R<sub>20</sub>: difference between resistance at 6 Hz and resistance at 20 Hz; Ax: area under the reactance curve; R: resistance from model fitting; C: compliance from model fitting; R<sub>el</sub>: resistance at end inspiration; R<sub>eE</sub>: resistance at end expiration; ΔR: R<sub>eE</sub>-R<sub>el</sub>; X<sub>el</sub>: reactance at end inspiration, R<sub>eE</sub>: reactance at end expiration; ΔX: X<sub>eE</sub>-X<sub>el</sub>.

Median (IQR) values.

Units: R and X variables: hPa.L.s<sup>-1</sup>; C: L.hPa<sup>-1</sup>; F<sub>res</sub>: Hz; Ax: hPa.L<sup>-1</sup>.

**Table S3 : Comparison between models adjusted for height only and height, sex and ethnicity**

|                                 | Model with height only (n=692)           |           |                     | Model with height, sex, and ethnicity (n=692) |                                          |                                       |           |                     |
|---------------------------------|------------------------------------------|-----------|---------------------|-----------------------------------------------|------------------------------------------|---------------------------------------|-----------|---------------------|
|                                 | Height Coefficient (95% CI)              | BIC value | Adj. R <sup>2</sup> | Height Coefficient (95% CI)                   | Sex Coefficient (95% CI)                 | Ethnicity Coefficient (95% CI)        | BIC value | Adj. R <sup>2</sup> |
| R <sub>6</sub>                  | <b>-0.019</b><br><b>(-0.020; -0.018)</b> | -156.50   | 0.723               | <b>-0.019</b><br><b>(-0.020; -0.018)</b>      | <b>-0.032</b><br><b>(-0.064; -0.000)</b> | 0.008<br>(-0.024; 0.041)              | -147.55   | 0.724               |
| R <sub>8</sub>                  | <b>-0.019</b><br><b>(-0.020; -0.018)</b> | -187.05   | 0.735               | <b>-0.019</b><br><b>(-0.020; -0.018)</b>      | -0.028<br>(-0.059; 0.003)                | 0.006<br>(-0.026; 0.038)              | -177.12   | 0.735               |
| R <sub>10</sub>                 | <b>-0.019</b><br><b>(-0.020; -0.018)</b> | -227.68   | 0.747               | <b>-0.019</b><br><b>(-0.020; -0.018)</b>      | -0.023<br>(-0.054; 0.007)                | 0.019<br>(-0.012; 0.049)              | -218.14   | 0.745               |
| X <sub>6</sub>                  | <b>-727</b><br><b>(-793; -661)</b>       | 2189.17   | 0.405               | <b>-731</b><br><b>(-797; -665)</b>            | 0.089<br>(-0.085; 0.264)                 | 0.166<br>(-0.009; 0.341)              | 2197.61   | 0.407               |
| X <sub>8</sub>                  | <b>-646</b><br><b>(-702; -590)</b>       | 1967.53   | 0.425               | <b>-649</b><br><b>(-795; -593)</b>            | <b>0.182</b><br><b>(0.034; 0.330)</b>    | <b>0.163</b><br><b>(0.014; 0.311)</b> | 1969.75   | 0.433               |
| X <sub>10</sub>                 | <b>-530</b><br><b>(-583; -478)</b>       | 1886.30   | 0.359               | <b>-533</b><br><b>(-586; -480)</b>            | 0.118<br>(-0.022; 0.258)                 | <b>0.141</b><br><b>(0.001; 0.281)</b> | 1892.48   | 0.364               |
| F <sub>res</sub>                | <b>-0.006</b><br><b>(-0.007; -0.005)</b> | -131.29   | 0.230               | <b>-0.006</b><br><b>(-0.007; -0.005)</b>      | -0.010<br>(-0.047; 0.026)                | -0.004<br>(-0.042; 0.033)             | -119.20   | 0.227               |
| R <sub>6</sub> -R <sub>20</sub> | <b>-0.031</b><br><b>(-0.036; -0.026)</b> | 2258.30   | 0.177               | <b>-0.031</b><br><b>(-0.037; -0.026)</b>      | -0.092<br>(-0.275; 0.092)                | -0.152<br>(-0.336; 0.033)             | 2267.66   | 0.179               |
| Ax                              | <b>-0.029</b><br><b>(-0.031; -0.026)</b> | 1322.14   | 0.416               | <b>-0.029</b><br><b>(-0.031; -0.026)</b>      | -0.052<br>(-0.146; 0.041)                | -0.014<br>(-0.108; 0.080)             | 1333.89   | 0.416               |
| R                               | <b>-0.019</b><br><b>(-0.020; -0.018)</b> | -220.75   | 0.739               | <b>-0.019</b><br><b>(-0.019; -0.018)</b>      | -0.025<br>(-0.055; 0.006)                | 0.023<br>(-0.008; 0.054)              | -212.14   | 0.740               |
| C                               | <b>0.017</b><br><b>(0.016; 0.018)</b>    | 284.34    | 0.523               | <b>0.017</b><br><b>(0.016; 0.018)</b>         | 0.038 (-0.006;<br>0.082)                 | 0.045<br>(0.000; 0.089)               | 290.30    | 0.526               |
| X <sub>eE</sub>                 | <b>-409</b><br><b>(-476; -343)</b>       | 2201.57   | 0.174               | <b>-408</b><br><b>(-474; -341)</b>            | <b>0.197</b><br><b>(0.021; 0.373)</b>    | 0.055<br>(-0.121; 0.232)              | 2209.31   | 0.178               |
| X <sub>eI</sub>                 | <b>-577</b><br><b>(-630; -524)</b>       | 1894.15   | 0.397               | <b>-579</b><br><b>(-632; -526)</b>            | <b>0.184</b><br><b>(0.044; 0.325)</b>    | 0.137<br>(-0.004; 0.277)              | 1896.54   | 0.404               |
| ΔR                              | <b>-0.014</b><br><b>(-0.020; -0.009)</b> | 2307.58   | 0.040               | <b>-0.014</b><br><b>(-0.020; -0.009)</b>      | 0.058<br>(-0.132; 0.249)                 | -0.101<br>(-0.292; 0.091)             | 2319.28   | 0.039               |
| ΔX                              | <b>-0.012</b><br><b>(-0.016; -0.008)</b> | 1870.89   | 0.050               | <b>-0.012</b><br><b>(-0.016; -0.008)</b>      | 0.012<br>(-0.127; 0.151)                 | -0.090<br>(-0.230; 0.050)             | 1882.34   | 0.049               |

R<sub>6</sub>, R<sub>8</sub> and R<sub>10</sub>: resistance at 6, 8 and 10 Hz; X<sub>6</sub>, X<sub>8</sub> and X<sub>10</sub>: reactance at 6, 8 and 10 Hz; F<sub>res</sub>: resonance frequency; R<sub>6</sub>-R<sub>20</sub>: difference between resistance at 6 Hz and resistance at 20 Hz; Ax: area under the reactance curve; R: resistance from model fitting; C: compliance from model fitting; R<sub>eI</sub>: resistance at end inspiration; R<sub>eE</sub>: resistance at end expiration; ΔR: R<sub>eE</sub>-R<sub>eI</sub>; X<sub>eI</sub>: reactance at end inspiration, R<sub>eE</sub>: reactance at end expiration; ΔX: X<sub>eE</sub>-X<sub>eI</sub>. BIC: Bayesian Information Criterion; Adj R<sup>2</sup>: adjusted R<sup>2</sup>. Statistically significant results are printed in bold.

Units: R and X variables: hPa.L.s<sup>-1</sup>; C: L.hPa<sup>-1</sup>; F<sub>res</sub>: Hz; Ax: hPa.L<sup>-1</sup>.

**Table S4: Reference equations for children 3 to 7 years of age from the DCHS cohort**

| <b>Outcome</b>                                               | <b>Equation</b>                        | <b>Adj R<sup>2</sup></b> | <b>SEE</b> |
|--------------------------------------------------------------|----------------------------------------|--------------------------|------------|
| <b>R<sub>6</sub></b> (hPa.s.L <sup>-1</sup> )                | $\exp(4.23 - 0.0178 \cdot \text{Ht})$  | 0.466                    | 0.203      |
| <b>R<sub>8</sub></b> (hPa.s.L <sup>-1</sup> )                | $\exp(4.17 - 0.0178 \cdot \text{Ht})$  | 0.479                    | 0.198      |
| <b>R<sub>10</sub></b> (hPa.s.L <sup>-1</sup> )               | $\exp(4.14 - 0.0179 \cdot \text{Ht})$  | 0.490                    | 0.194      |
| <b>X<sub>6</sub></b> (hPa.s.L <sup>-1</sup> )                | $5.06 - 888 \cdot \text{Ht}^{-1}$      | 0.333                    | 1.211      |
| <b>X<sub>8</sub></b> (hPa.s.L <sup>-1</sup> )                | $4.81 - 798 \cdot \text{Ht}^{-1}$      | 0.366                    | 1.011      |
| <b>X<sub>10</sub></b> (hPa.s.L <sup>-1</sup> )               | $3.72 - 630 / \text{Ht}$               | 0.291                    | 0.946      |
| <b>F<sub>res</sub></b> (Hz)                                  | $\exp(3.85 - 0.0074 \cdot \text{Ht})$  | 0.116                    | 0.204      |
| <b>R<sub>6</sub>-R<sub>20</sub></b> (hPa.s.L <sup>-1</sup> ) | $5.69 - 0.0316 \cdot \text{Ht}$        | 0.066                    | 1.248      |
| <b>AX</b> (hPa.L <sup>-1</sup> )                             | $\exp(7 - 0.0353 \cdot \text{Ht})$     | 0.309                    | 0.561      |
| <b>R</b> (hPa.s.L <sup>-1</sup> )                            | $\exp(4.12 - 0.0184 \cdot \text{Ht})$  | 0.510                    | 0.192      |
| <b>C</b> (L.hPa <sup>-1</sup> )                              | $\exp(-0.30 + 0.0207 \cdot \text{Ht})$ | 0.385                    | 0.279      |
| <b>R<sub>eE</sub></b> (hPa.s.L <sup>-1</sup> )               | $\exp(4.30 - 0.0198 \cdot \text{Ht})$  | 0.486                    | 0.216      |
| <b>R<sub>eI</sub></b> (hPa.s.L <sup>-1</sup> )               | $\exp(3.93 - 0.0170 \cdot \text{Ht})$  | 0.408                    | 0.218      |
| <b>X<sub>eE</sub></b> (hPa.s.L <sup>-1</sup> )               | $3.11 - 502 \cdot \text{Ht}^{-1}$      | 0.139                    | 1.199      |
| <b>X<sub>eI</sub></b> (hPa.s.L <sup>-1</sup> )               | $3.96 - 651 \cdot \text{Ht}^{-1}$      | 0.301                    | 0.955      |
| <b>ΔR</b> (hPa.s.L <sup>-1</sup> )                           | $4.96 - 0.0403 \cdot \text{Ht}$        | 0.095                    | 1.316      |
| <b>ΔX</b> (hPa.s.L <sup>-1</sup> )                           | $1.97 - 0.0132 \cdot \text{Ht}$        | 0.018                    | 0.989      |

R<sub>6</sub>, R<sub>8</sub> and R<sub>10</sub>: resistance at 6, 8 and 10 Hz; X<sub>6</sub>, X<sub>8</sub> and X<sub>10</sub>: reactance at 6, 8 and 10 Hz; F<sub>res</sub>: resonance frequency; R<sub>6</sub>-R<sub>20</sub>: difference between resistance at 6 Hz and resistance at 20 Hz; Ax: area under the reactance curve; R: resistance from model fitting; C: compliance from model fitting; R<sub>eI</sub>: resistance at end inspiration; R<sub>eE</sub>: resistance at end expiration; ΔR: R<sub>eE</sub>-R<sub>eI</sub>; X<sub>eI</sub>: reactance at end inspiration, X<sub>eE</sub>: reactance at end expiration; ΔX: X<sub>eE</sub>-X<sub>eI</sub>; Adj R<sup>2</sup>: adjusted R<sup>2</sup>; SEE: standard error of the estimate.

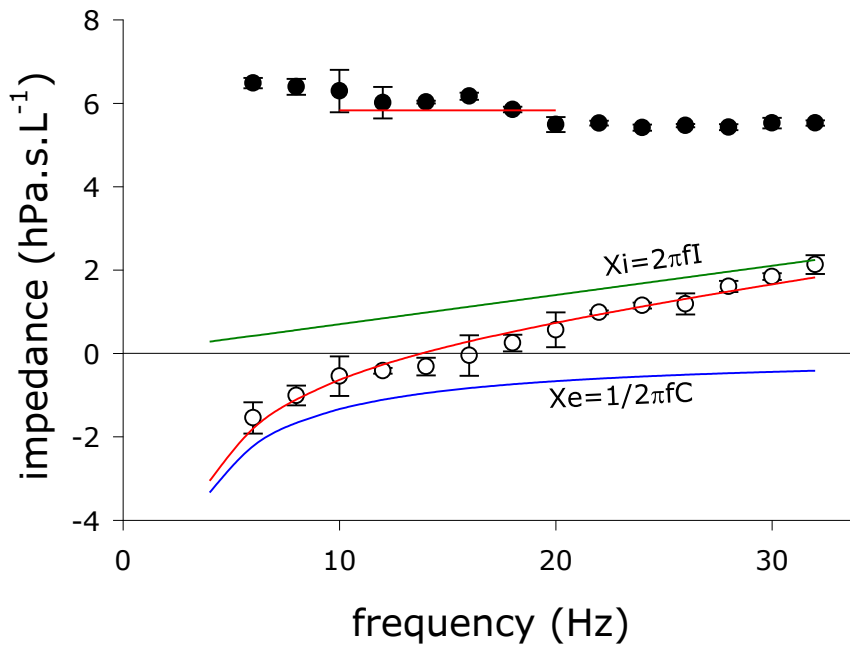

**Figure S1:** Illustration of the resistance (R) - inertance (I) – compliance (C) model fitting to measured impedance data. Mean values of resistance (●) and reactance (○) from repeated measurements, whiskers indicate standard deviation. Model fitting curves are plotted in red. R was obtained as the mean value in the 10-20-Hz frequency (f) range; I and C were obtained from fitting the reactance (X) data by the model  $X = 2\pi f I - 1/(2\pi f C)$ . Green and blue lines, respectively, illustrate the inertial ( $X_i$ ) and elastic ( $X_e$ ) components of the total X.

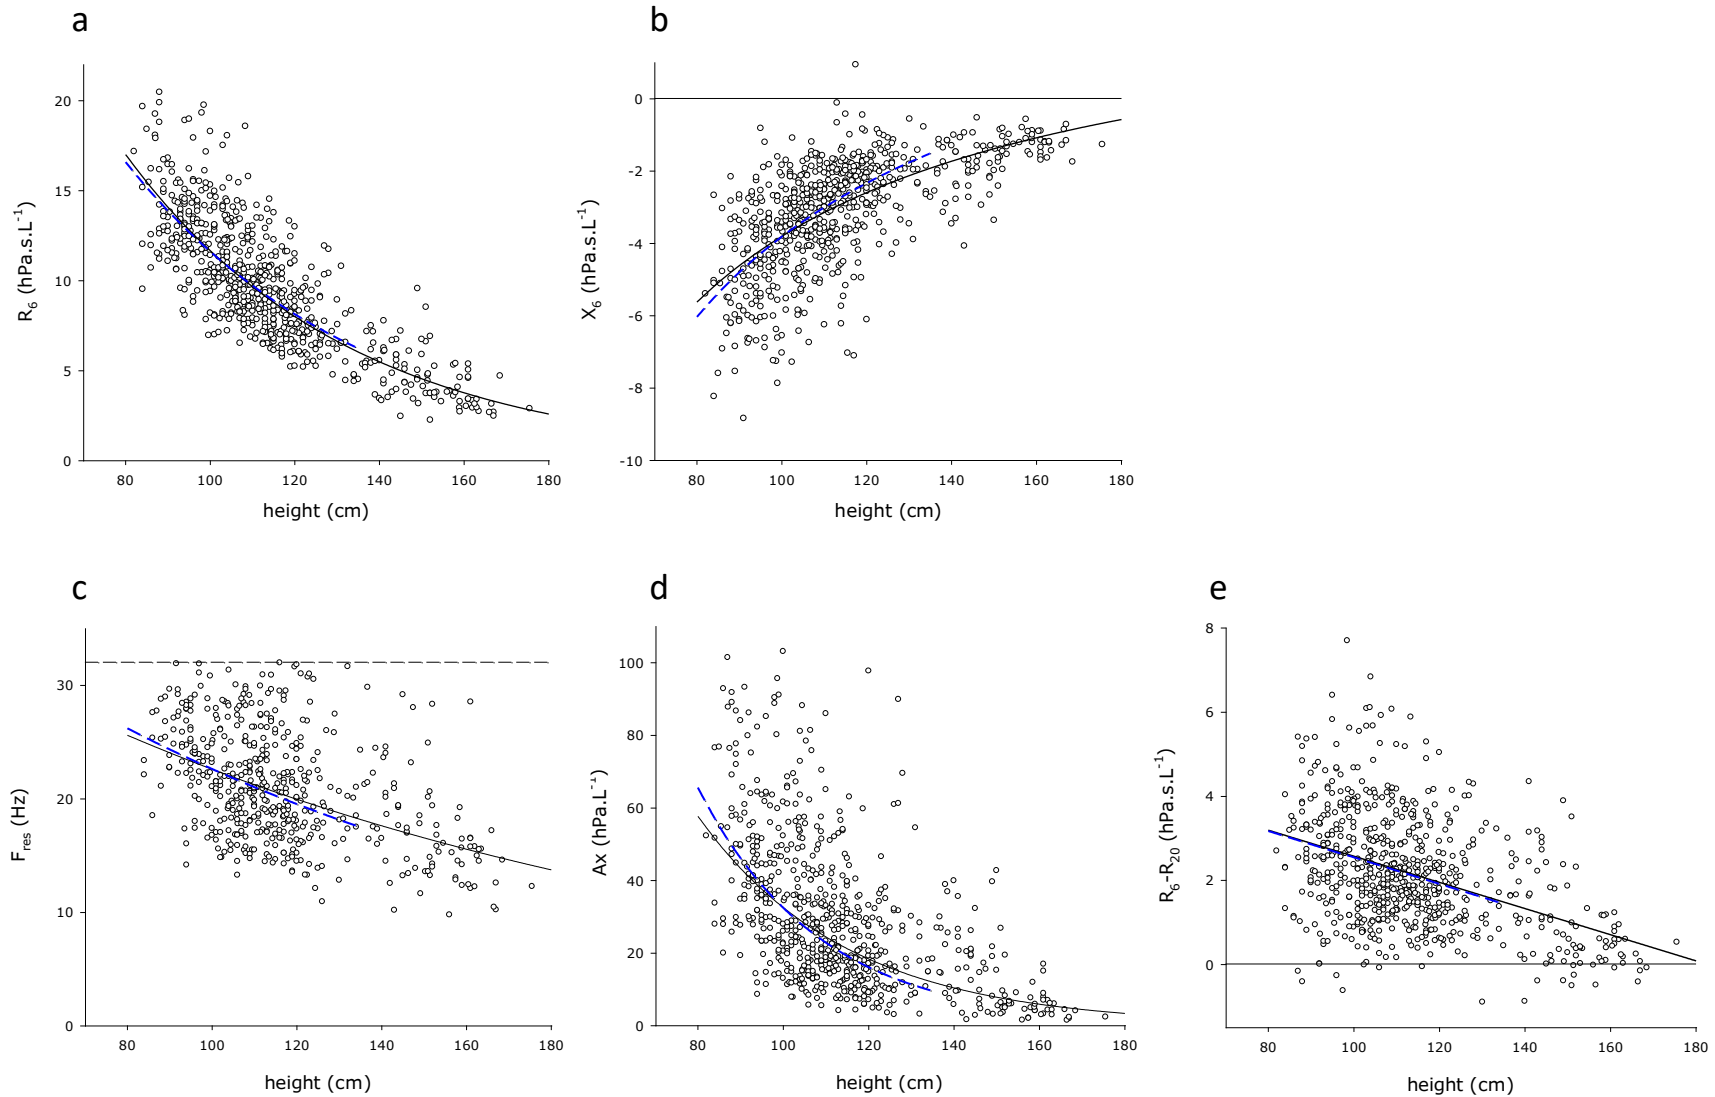

**Figure S2:** Conventional oscillometry measures vs height: a) resistance at 6 Hz ( $R_6$ ), b) reactance at 6 Hz ( $X_6$ ), c) resonance frequency ( $F_{res}$ ), d) area under the reactance curve ( $Ax$ ) and e) frequency dependence of resistance ( $R_6-R_{20}$ ). Solid and dashed lines, respectively, indicate prediction equations for the 3-17-yr and 3-7-yr ranges.



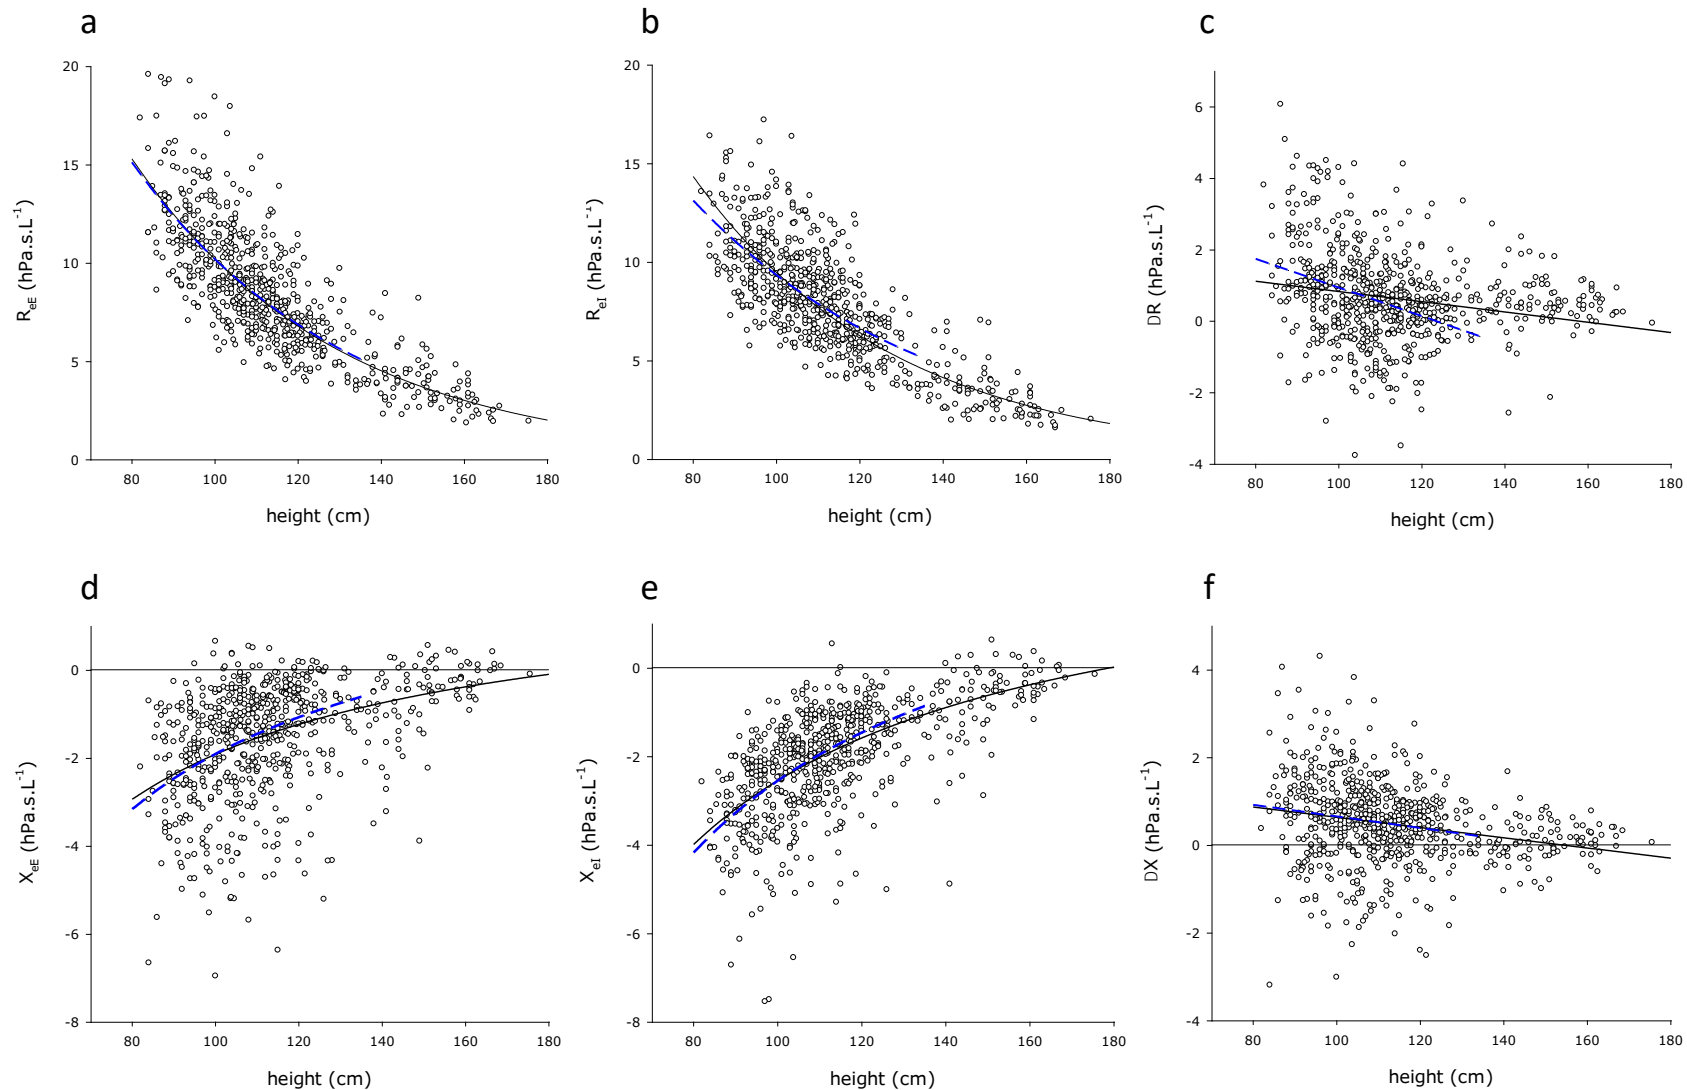

**Figure S3:** Intra-breath oscillometry measures **measures** vs height: a) resistance at end expiration ( $R_{eE}$ ), b) resistance at end inspiration ( $R_{eI}$ ), c) tidal change in resistance  $\Delta R = R_{eE} - R_{eI}$ , d) reactance at end expiration ( $X_{eE}$ ), e) reactance at end inspiration ( $X_{eI}$ ) and f) tidal change in reactance ( $\Delta X = X_{eE} - X_{eI}$ ). Solid and dashed lines, respectively, indicate prediction equations for the 3-17-yr and 3-7-yr ranges.

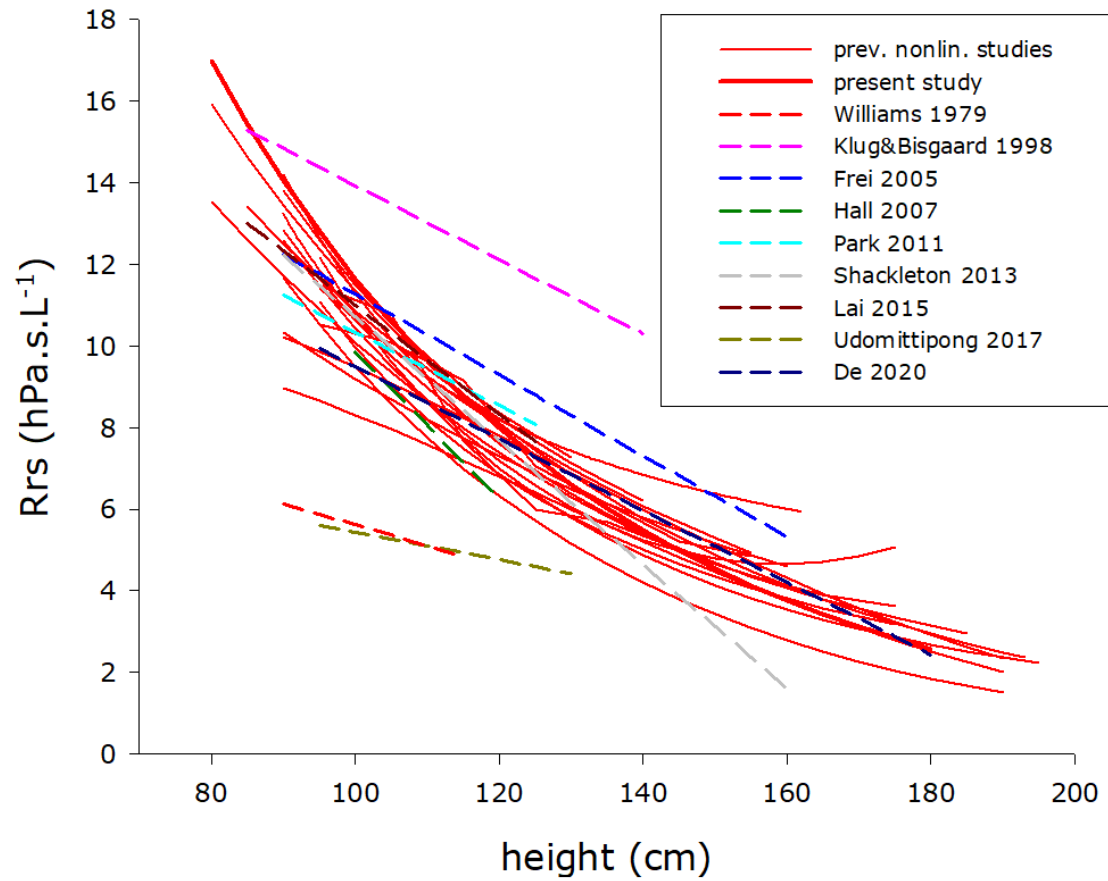

**Figure S4:** Comparison of respiratory resistance (Rrs) vs height (Ht) relationships with previous studies using linear regression between Rrs and Ht (see References). For the individual studies reporting nonlinear Rrs vs Ht relationships, see Figure 2 in the main document.

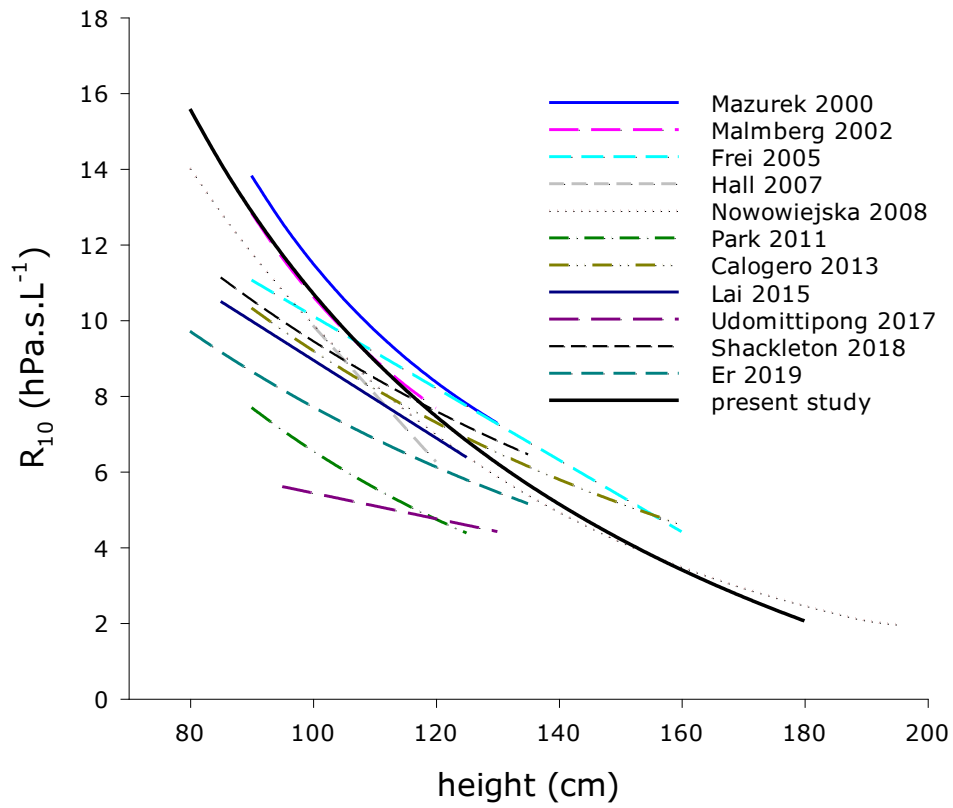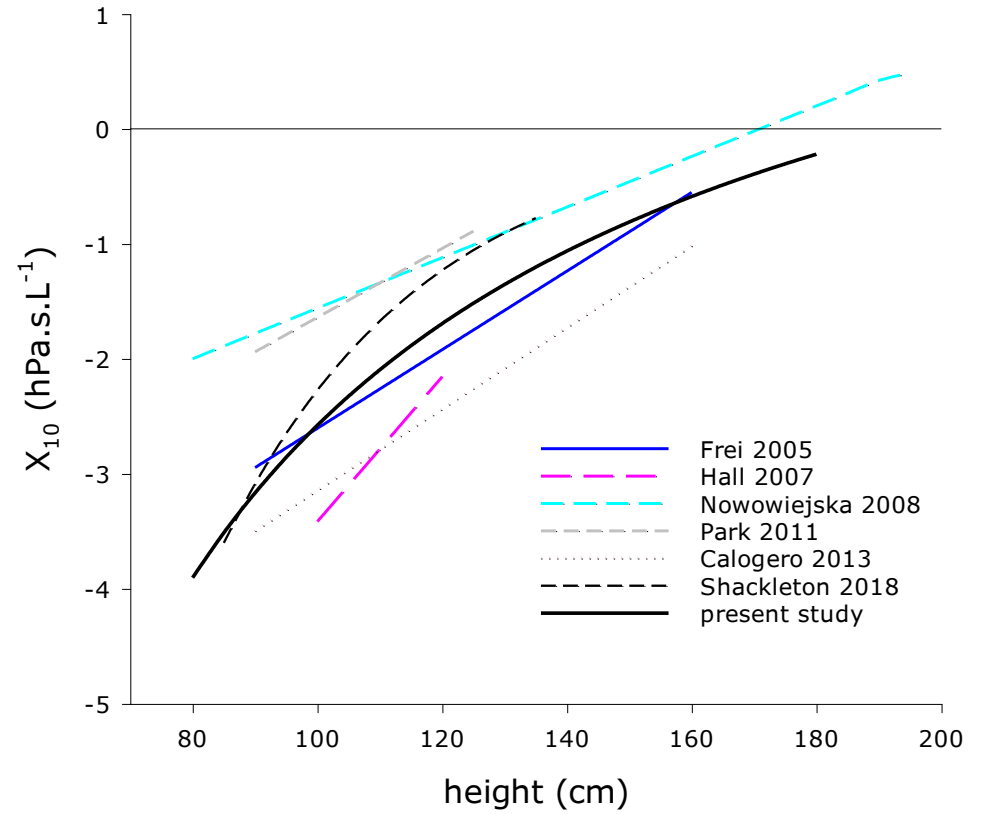

**Figure S5:** Comparison of at 10-Hz resistance ( $R_{10}$ , left) and reactance ( $X_{10}$ , right) vs height (Ht) relationships with previous studies (see References).

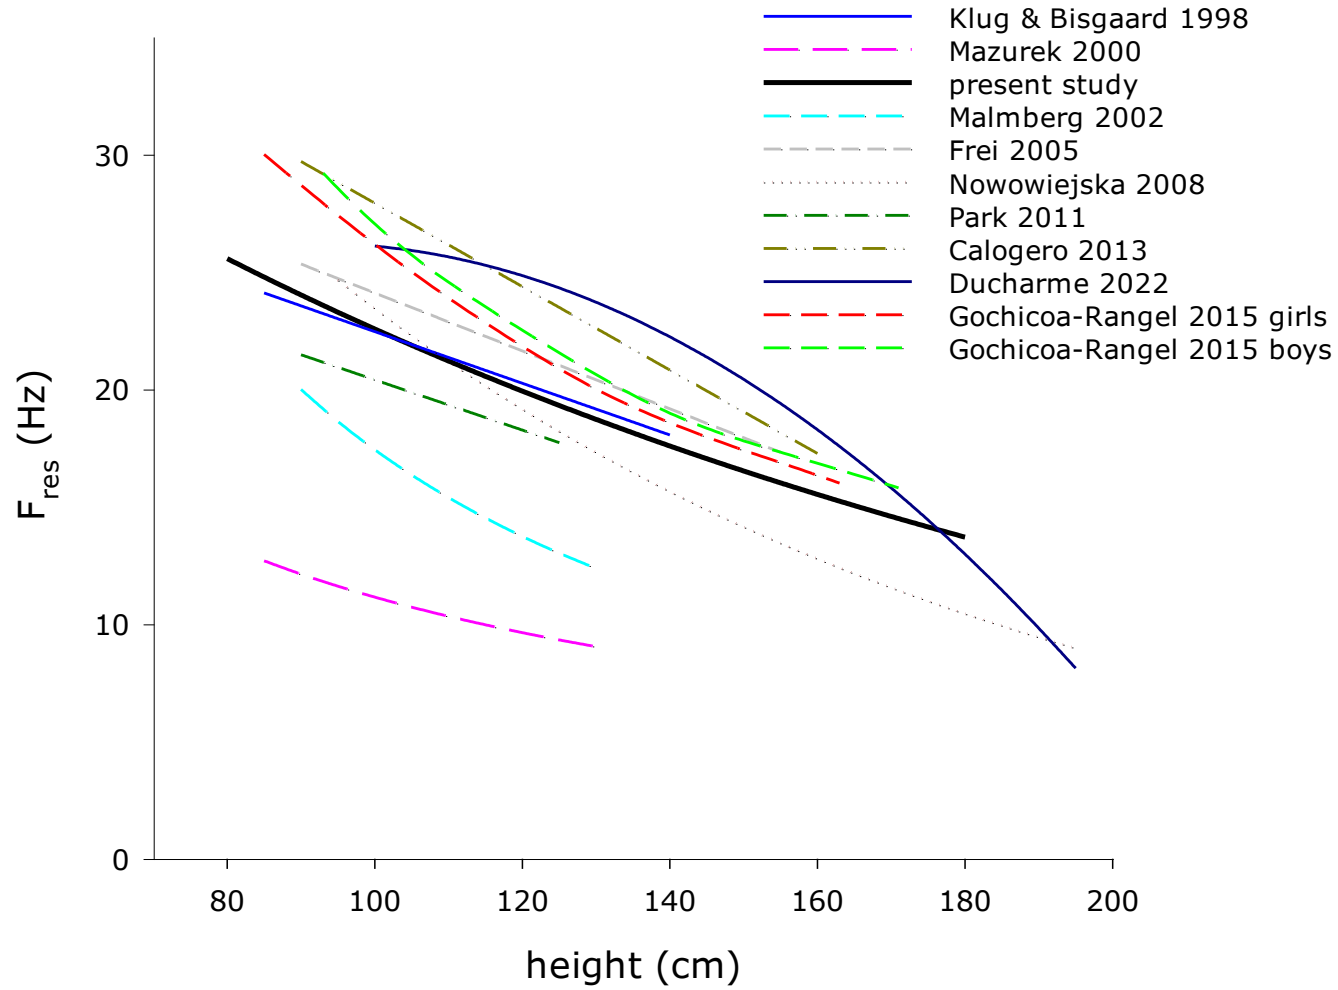

**Figure S6:** Comparison of resonance frequency ( $F_{res}$ ) vs height (Ht) relationships with previous studies (see References).

**Table S5 : Summary of reference studies on resistance (R) vs height (Ht) relationships**

| Author(s) [ref]          | year | frequency (Hz) | device         | country/race      | no. of subjects | age range (yr) | reference equation                                     | units (Zrs; Ht)                           |
|--------------------------|------|----------------|----------------|-------------------|-----------------|----------------|--------------------------------------------------------|-------------------------------------------|
| Mansell et al. [1]       | 1972 | 5              | custom made    | Canada            | 79              | 3-17           | $R5=\exp(1.877-0.0089\cdot Ht)$                        | cmH <sub>2</sub> O.s.L <sup>-1</sup> ; cm |
| Cogswell [2]             | 1973 | 5-7            | custom made    | UK                | 204             | 3-12           | R5-7 vs Ht range data                                  | cmH <sub>2</sub> O.s.L <sup>-1</sup> ; cm |
| Stanescu et al. [3]      | 1979 | 4-9            | custom made    | Belgium           | 130             | 3-14           | R4 vs Ht range data                                    | cmH <sub>2</sub> O.s.L <sup>-1</sup> ; cm |
| Solymer et al. [4]       | 1985 | 2-12           | custom made    | Sweden            | 218             | 2-18           | $R4=\text{antilog}(1.053-2.18\cdot \log(Ht))$          | kPa.s.L <sup>-1</sup> ; m                 |
| Hordvik et al. [5]       | 1985 | 2-26           | custom made    | USA/C             | 138             | 2-16           | $R6=9.2\cdot Ht^2-34.1\cdot Ht+35.2$                   | cmH <sub>2</sub> O.s.L <sup>-1</sup> ; cm |
| Hantos et al. [6]        | 1985 | 3-10           | custom made    | Hungary           | 121             | 4-16           | $R(3-10)=1.28\cdot 10^5\cdot Ht^{-2.05}$               | cmH <sub>2</sub> O.s.L <sup>-1</sup> ; cm |
| Duiverman et al. [7]     | 1985 | 2-26           | custom made    | The Netherlands/C | 255             | 2.3-12.5       | $R6=0.0017\cdot Ht^2-0.541\cdot Ht+47.73$              | cmH <sub>2</sub> O.s.L <sup>-1</sup> ; cm |
| Ducharme et al. [8]      | 1998 | 8-16           | Custo Vit R    | Canada/mixed      | 199             | 3-17           | $R8=\exp(10.99-2.37\cdot \ln(Ht))$                     | kPa.s.L <sup>-1</sup> ; cm                |
| Mazurek et al. [9]       | 2000 | 4-32           | custom made    | Poland            | 127             | 2.5-7.5        | $R6=\exp(2.4422-1.7447\cdot \ln(Ht))$                  | hPa.s.L <sup>-1</sup> ; m                 |
| Malmberg et al.[10]      | 2002 | 5-35           | Jaeger IOS     | Finland           | 109             | 2-7            | $R5=\exp(2.115-1.786\cdot \ln(Ht))$                    | kPa.s.L <sup>-1</sup> ; cm                |
| Dencker et al. [11]      | 2006 | 5-35           | Jaeger IOS     | Finland-Sweden/C  | 360             | 2-11           | R5 vs Ht curve                                         | kPa.s.L <sup>-1</sup> ; cm                |
| Nowowiejska et al. [12]  | 2008 | 5-35           | Jaeger IOS     | Poland            | 626             | 3-18           | $R5=\exp(-0.0169\cdot Ht+1.818)$                       | kPa.s.L <sup>-1</sup> ; cm                |
| Calogero et al. [13]     | 2013 | 4-48           | Chess i2M      | Australia-Italy/C | 760             | 2-13           | $R6=\exp(3.3738-0.01155\cdot Ht)$                      | hPa.s.L <sup>-1</sup> ; cm                |
| Shackleton et al. [14]   | 2018 | 6-26           | custom made**  | Australia/Hungary | 319             | 3-6            | $R6=\exp(3.3501-0.01033\cdot Ht)$                      | hPa.s.L <sup>-1</sup> ; cm                |
| AlBlooshi et al. [15]    | 2018 | 5-37           | tremoflo C-100 | UAE/Emirati       | 291             | 4-12           | $R5=\exp(3.786-0.014\cdot Ht)$                         | cmH <sub>2</sub> O.s.L <sup>-1</sup> ; cm |
| Er et al. [16]           | 2019 | 5-35           | Jaeger IOS     | Turkey/Turkish    | 151             | 3-7            | $R5=\text{antilog}(0.527-0.005\cdot Ht)$               | kPa.s.L <sup>-1</sup> ; cm                |
| Ducharme et al. [17]-1   | 2022 | 5-37           | Resmon Pro     | Canadian/mixed    | 271             | 3-17           | $R5=\exp(-0.1509+0.00809\cdot Ht-0.0000824\cdot Ht^2)$ | kPa.s.L <sup>-1</sup> ; cm                |
| Ducharme et al. [17]-2   | 2022 | 5-37           | tremoflo C-100 | Canadian/mixed    | 292             | 3-17           | $R5=\exp(-0.0252+0.00809\cdot Ht-0.0000817\cdot Ht^2)$ | kPa.s.L <sup>-1</sup> ; cm                |
| Frei et al. [18]         | 2005 | 5-35           | Jaeger IOS     | Canada            | 222             | 3-10           | $R5=2.117-0.0099\cdot Ht$                              | kPa.s.L <sup>-1</sup> ; cm                |
| Hall et al. [19]         | 2007 | 4-48           | Chess i2M      | Australia         | 149             | 2-7            | $R6=27.86-0.18\cdot Ht$                                | hPa.s.L <sup>-1</sup> ; cm                |
| Park et al. [20]         | 2011 | 5-35           | Jaeger IOS     | Korea/Korean      | 133             | 3-6            | $R5=1.934-0.009\cdot Ht$                               | kPa.s.L <sup>-1</sup> ; cm                |
| Shackleton et al. [21]   | 2013 | 4-48           | Chess i2M      | Mexico/Mexican    | 584             | 3-5            | $R6=25.918-0.152\cdot Ht$                              | hPa.s.L <sup>-1</sup> ; cm                |
| Lai et al. [22]          | 2015 | 5-35           | Jaeger IOS     | Taiwan/Taiwanese  | 150             | 2-6            | $R5=2.4395-0.0134\cdot Ht$                             | kPa.s.L <sup>-1</sup> ; m                 |
| Udomittipong et al. [23] | 2017 | 4-48           | Quark i2M      | Thailand/Thai     | 233             | 3-7            | $R6=8.834-0.034\cdot Ht$                               | hPa.s.L <sup>-1</sup> ; cm                |
| De et al. [24]           | 2020 | 5-19           | Resmon Pro     | India/Indian      | 159             | 5-17           | $R5=18.683-0.09\cdot Ht$ (boys)                        | cmH <sub>2</sub> O.s.L <sup>-1</sup> ; cm |

Nonlinear and linear predictions; C: Caucasian

**\*\*Online reference tool: See attached excel document\*\***

## References

1. Mansell A, Levison H, Kruger K, et al. Measurement of Respiratory Resistance in Children by Forced Oscillations. *American Review of Respiratory Disease*. 1972;106(5):710-4.
2. Cogswell J. Forced oscillation technique for determination of resistance to breathing in children. *Archives of Disease in Childhood*. 1973;48(4):259-66.
3. Stănescu D, Moavero NE, Veriter C, et al. Frequency dependence of respiratory resistance in healthy children. *J Appl Physiol Respir Environ Exerc Physiol*. 1979;47(2):268-72.
4. Solymar L, Aronsson PH, Sixt R. The forced oscillation technique in children with respiratory disease. *Pediatr Pulmonol*. 1985;1(5):256-61.
5. Hordvik NL, König P, Morris DA, et al. Normal values for forced oscillatory respiratory resistance in children. *Pediatric Pulmonology*. 1985;1(3):145-8.
6. Hantos Z, Daróczy B, Gyurkovits K. Total respiratory impedance in healthy children. *Pediatr Pulmonol*. 1985;1(2):91-8.
7. Duiverman E, Clement J, Van de Woestijne K, et al. Forced oscillation technique. Reference values for resistance and reactance over a frequency spectrum of 2-26 Hz in healthy children aged 2.3-12.5 years. *Bulletin Europeen de Physiopathologie Respiratoire*. 1985;21(2):171-8.
8. Ducharme FM, Davis GM, Ducharme GR. Pediatric reference values for respiratory resistance measured by forced oscillation. *Chest*. 1998;113(5):1322-8.
9. Mazurek H, Willim G, Marchal F, et al. Input respiratory impedance measured by head generator in preschool children. *Pediatr Pulmonol*. 2000;30(1):47-55.
10. Malmberg La, Pelkonen A, Poussa T, et al. Determinants of respiratory system input impedance and bronchodilator response in healthy Finnish preschool children. *Clinical physiology and functional imaging*. 2002;22(1):64-71.
11. Dencker M, Malmberg LP, Valind S, et al. Reference values for respiratory system impedance by using impulse oscillometry in children aged 2-11 years. *Clinical Physiology and Functional Imaging*. 2006;26(4):247-50.
12. Nowowiejska B, Tomalak W, Radliński J, et al. Transient reference values for impulse oscillometry for children aged 3-18 years. *Pediatr Pulmonol*. 2008;43(12):1193-7.
13. Calogero C, Simpson SJ, Lombardi E, et al. Respiratory impedance and bronchodilator responsiveness in healthy children aged 2-13 years. *Pediatr Pulmonol*. 2013;48(7):707-15.
14. Shackleton C, Czovek D, Grimwood K, et al. Defining 'healthy' in preschool-aged children for forced oscillation technique reference equations. *Respirology*. 2018;23(4):406-13.
15. AlBlooshi A, AlKalbani A, Narchi H, et al. Respiratory function in healthy Emirati children using forced oscillations. *Pediatric pulmonology*. 2018;53(7):936-41.
16. Er I, Gunlemez A, Baydemir C, et al. Impulse oscillometry reference values and correlation with predictors in Turkish preschool children. *Turkish Journal of Pediatrics*. 2019;61(4):560-7.
17. Ducharme FM, Smyrnova A, Lawson CC, et al. Reference values for respiratory sinusoidal oscillometry in children aged 3 to 17 years. *Pediatr Pulmonol*. 2022;57:2092-2102
18. Frei J, Jutla J, Kramer G, et al. Impulse oscillometry: reference values in children 100 to 150 cm in height and 3 to 10 years of age. *Chest*. 2005;128(3):1266-73.
19. Hall GL, Sly PD, Fukushima T, et al. Respiratory function in healthy young children using forced oscillations. *Thorax*. 2007;62(6):521-6.
20. Park JH, Yoon JW, Shin YH, et al. Reference values for respiratory system impedance using impulse oscillometry in healthy preschool children. *Korean journal of pediatrics*. 2011;54(2):64.
21. Shackleton C, Barraza-Villarreal A, Chen L, et al. Reference ranges for Mexican preschool-aged children using the forced oscillation technique. *Archivos de Bronconeumología (English Edition)*. 2013;49(8):326-9.
22. Lai S-H, Yao T-C, Liao S-L, et al. Reference Value of Impulse Oscillometry in Taiwanese Preschool Children. *Pediatrics and neonatology*. 2015;56(3):165-70.
23. Udomittipong K, Srisukhon W, Nimmannit A, et al. Respiratory impedance reference values for forced oscillation technique predicted by arm span and height in Thai preschool children. *Pediatric allergy, immunology, and pulmonology*. 2017;30(2):97-102.
24. De S, Banerjee N, Tiwari RR. Regression Equations of Respiratory Impedance Measured by Forced Oscillation Technique for Indian Children. *Indian Journal of Pediatrics*. 2020;87(3):192-9.
25. Gochicoa-Rangel L, Torre-Bouscoulet L, Martínez-Briseño D, et al. Values of impulse oscillometry in healthy Mexican children and adolescents. *Respiratory Care*. 2015;60(1):119-27.
